# Supplementary material for: Preparation of a single-phase all-solid-state battery via the crystallization of amorphous sodium vanadium phosphate
Source: Royal Society of Chemistry journal article supplement (doi:10.1039/d2cp04328a), 2022-01-01
Supplement: d2cp04328a1.pdf [file d2cp04328a1.pdf]

Supporting Information for

**Preparation of a single-phase all-solid-state battery via the crystallization of the  
amorphous sodium vanadium phosphate**

Atsushi Inoishi,\* Naoko Setoguchi, Shigeto Okada and Hikari Sakaebe

Institute for Materials Chemistry and Engineering, Kyushu University

Kasuga-Koen 6-1, Kasuga-shi, Fukuoka 816-8580, Japan

E-mail: inoishi@cm.kyushu-u.ac.jp

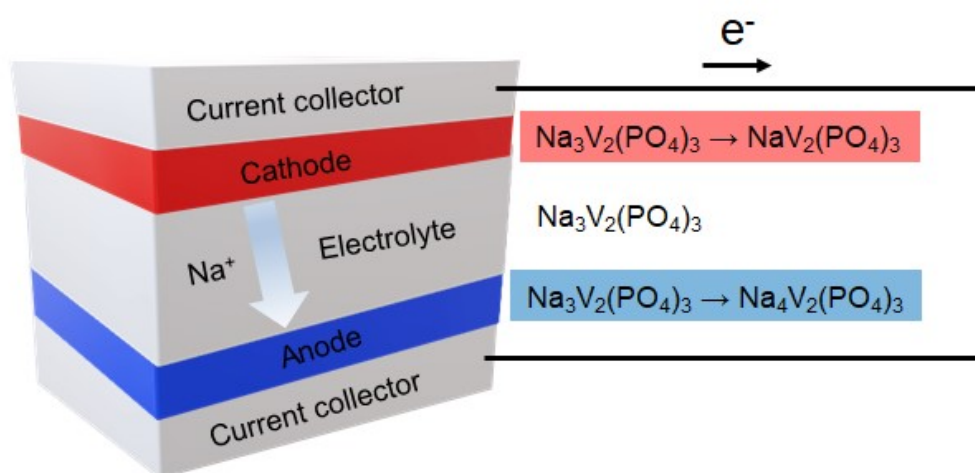

**Figure S1.** Schematic of the Pt/NVP/Pt single-phase cell.

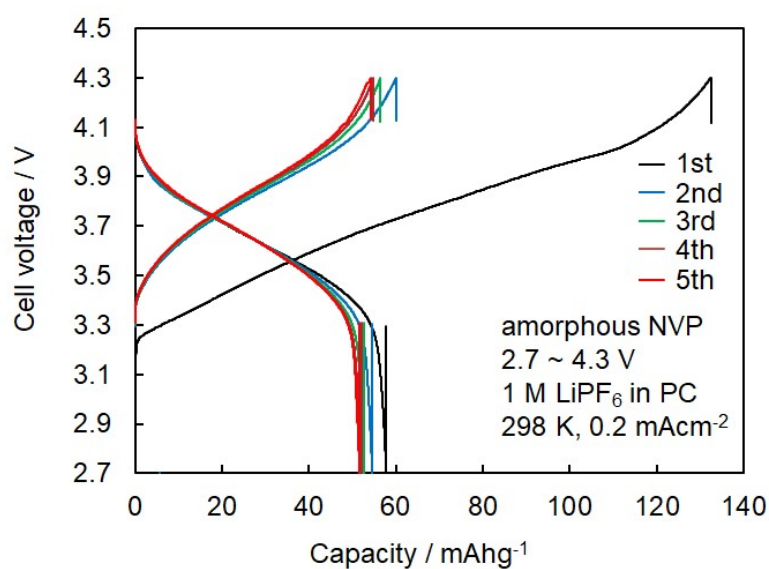

**Figure S2.** Charge-discharge curves for the half cell (positive electrode) using amorphous NVP and organic liquid electrolyte.

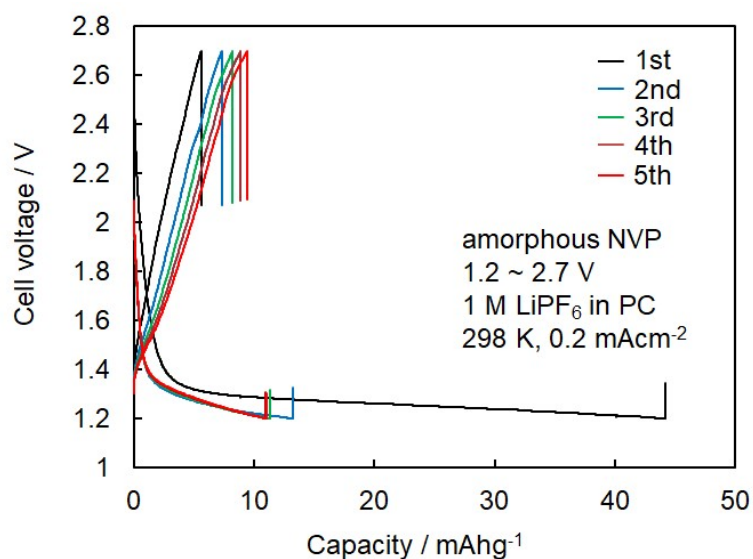

**Figure S3.** Charge-discharge curves for the half cell (negative electrode) using amorphous NVP and organic liquid electrolyte.

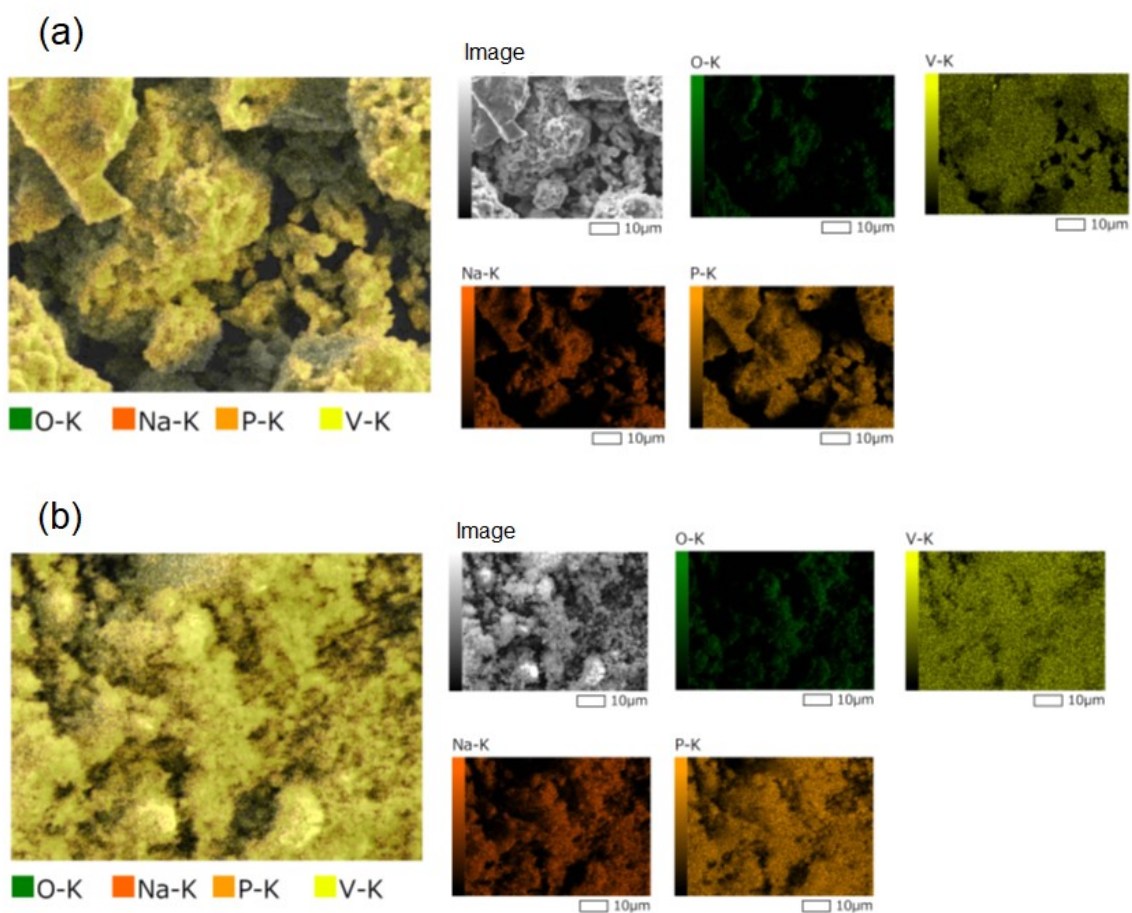

**Figure S4.** (a) EDS mapping of the crystalline NVP powder. (b) EDS mapping of the amorphous NVP powder.

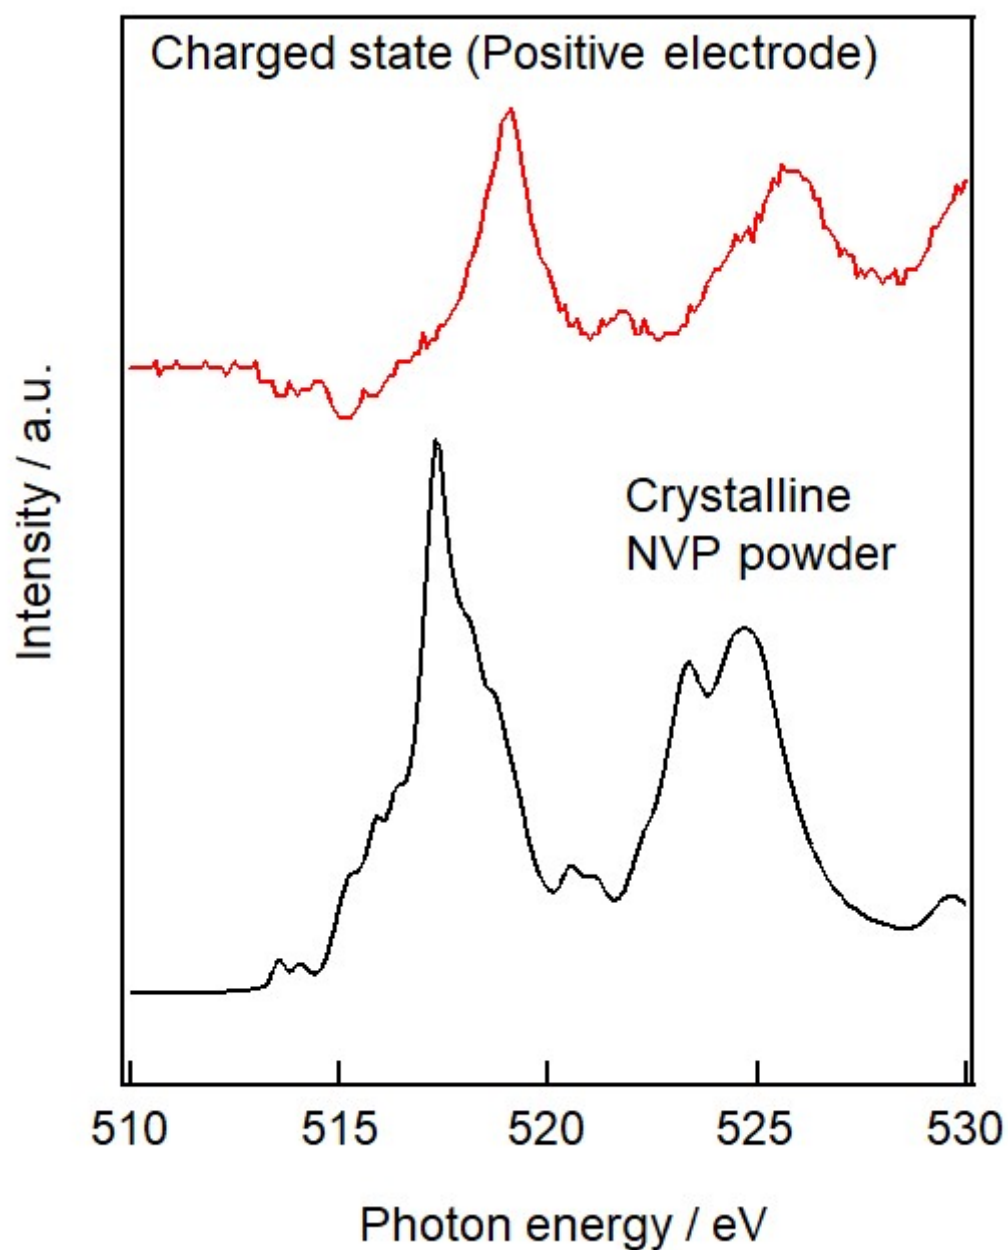

**Figure S5.** V L-edge XAS spectra of the crystalline NVP. Bottom spectrum shows the V L-edge spectrum of the crystalline NVP powder. The above spectrum shows the V L-edge spectrum of the positive electrode surface of the all-solid-state single-phase battery after charge.
